# Supplementary material for: Influence of functional groups on toxicity of carbon nanomaterials
Source: Copernicus journal article supplement (doi:10.5194/acp-19-8175-2019), 2019-06-24
Supplement: Supplementary file 1 [file acp-19-8175-2019-supplement.pdf]

Supplement of Atmos. Chem. Phys., 19, 8175–8187, 2019  
<https://doi.org/10.5194/acp-19-8175-2019-supplement>  
© Author(s) 2019. This work is distributed under  
the Creative Commons Attribution 4.0 License.

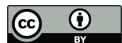

*Supplement of*

## **Influence of functional groups on toxicity of carbon nanomaterials**

**Yongchun Liu et al.**

*Correspondence to:* Y. Liu (liuyc@buct.edu.cn) and S. Liu (sjliu@rcees.ac.cn)

The copyright of individual parts of the supplement might differ from the CC BY 4.0 License.

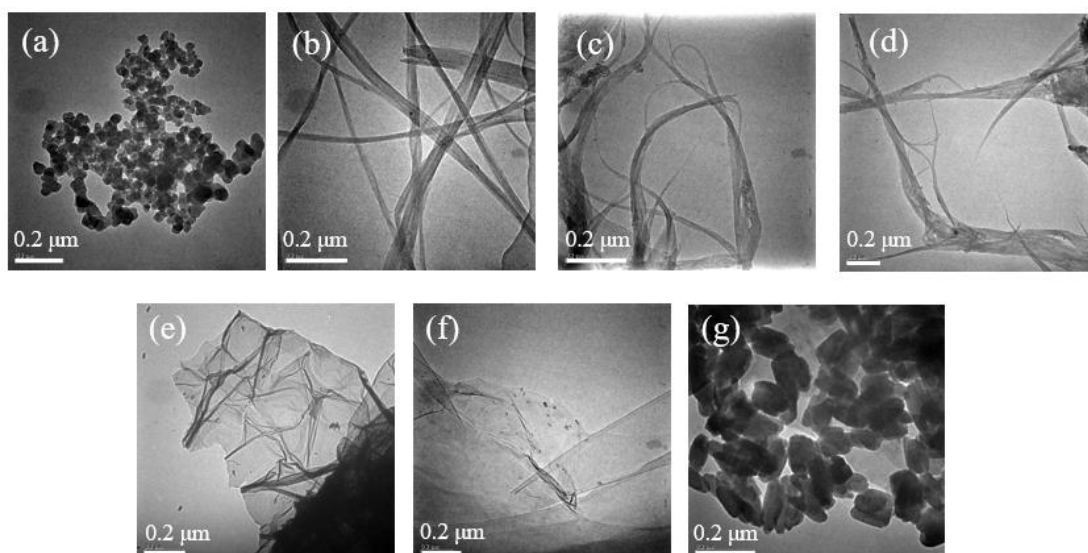

13

14 Figure S1. Morphology of (a) SB4A, (b) SWCNT, (c) SWCNT-OH, (d) SWCNT-COOH, (e)

15 graphene, (f) graphene oxide and (g) thermally treated graphene oxide at 200 °C in nitrogen.

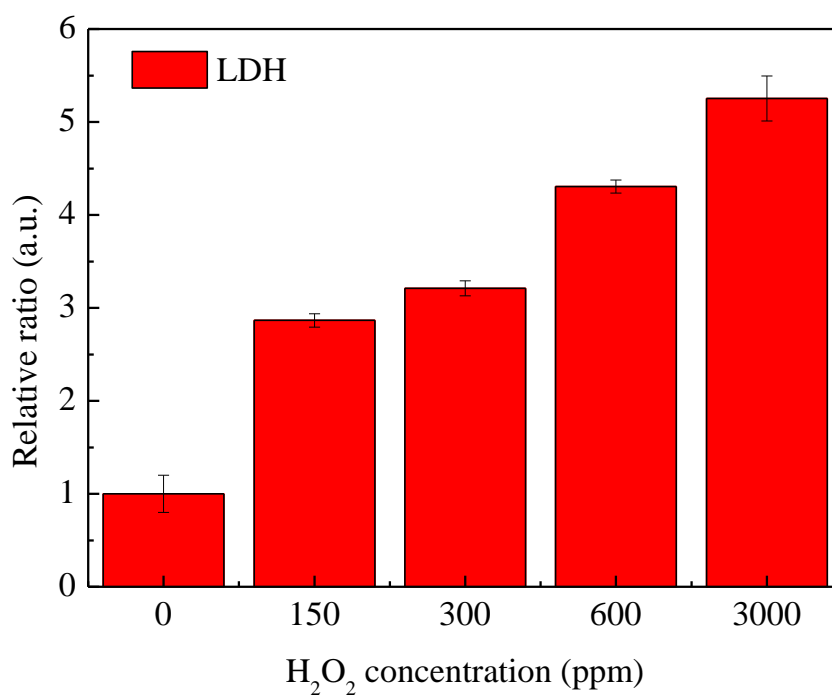

16

17 Figure S2. Positive control experiment results for LDH assay using different concentration of

18 H<sub>2</sub>O<sub>2</sub>.

19

20

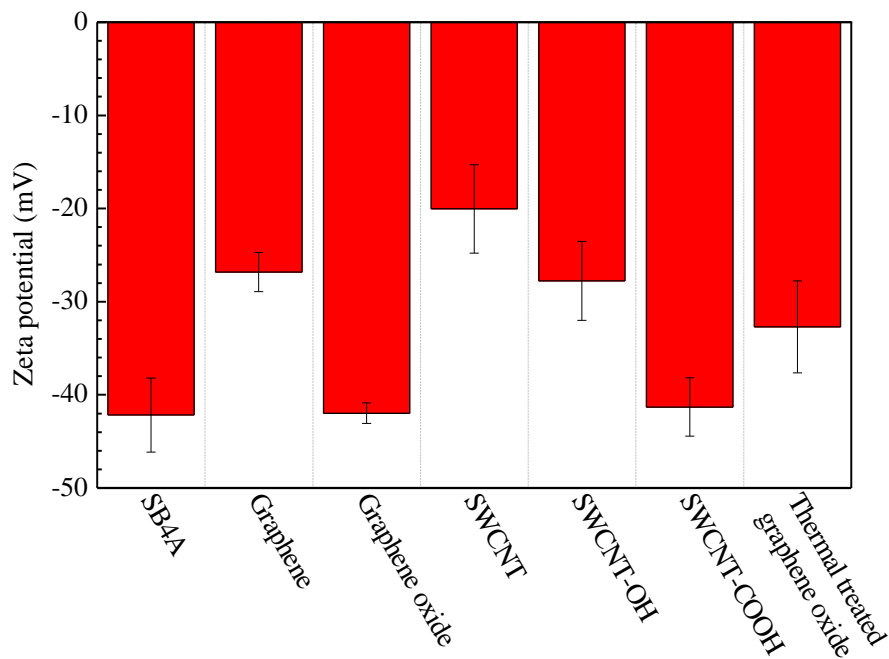

21

22

Fig. S3. Zeta potentials of carbon different nanomaterials.

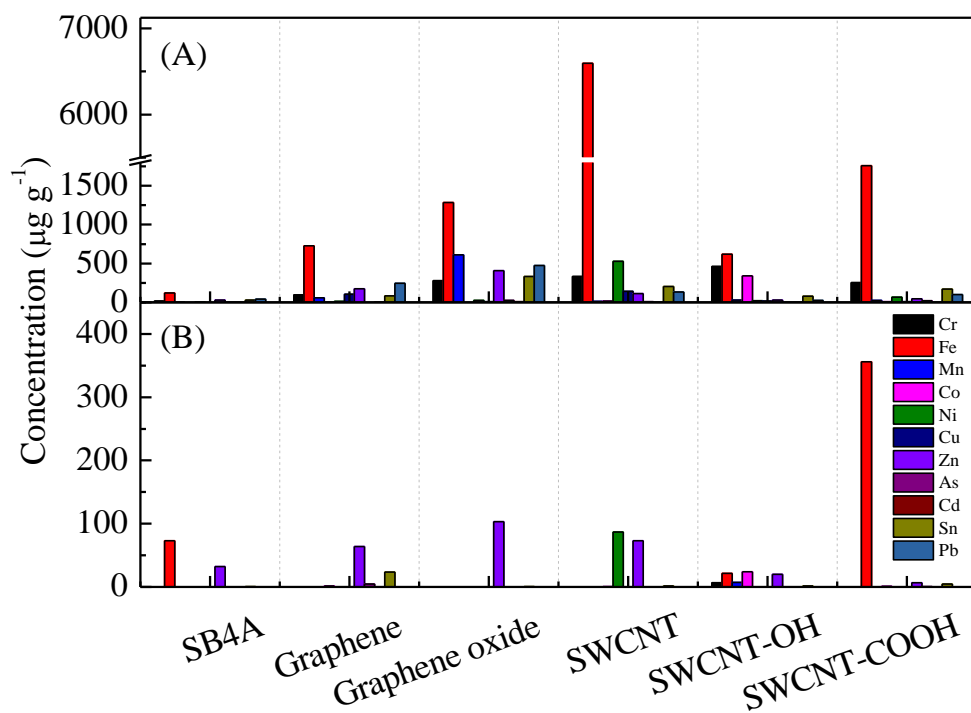

23

24 Figure S4. Content of metals in carbon nanomaterials (A) after digested with HNO<sub>3</sub>, (B)

25 after sonicated for 30 min in water.

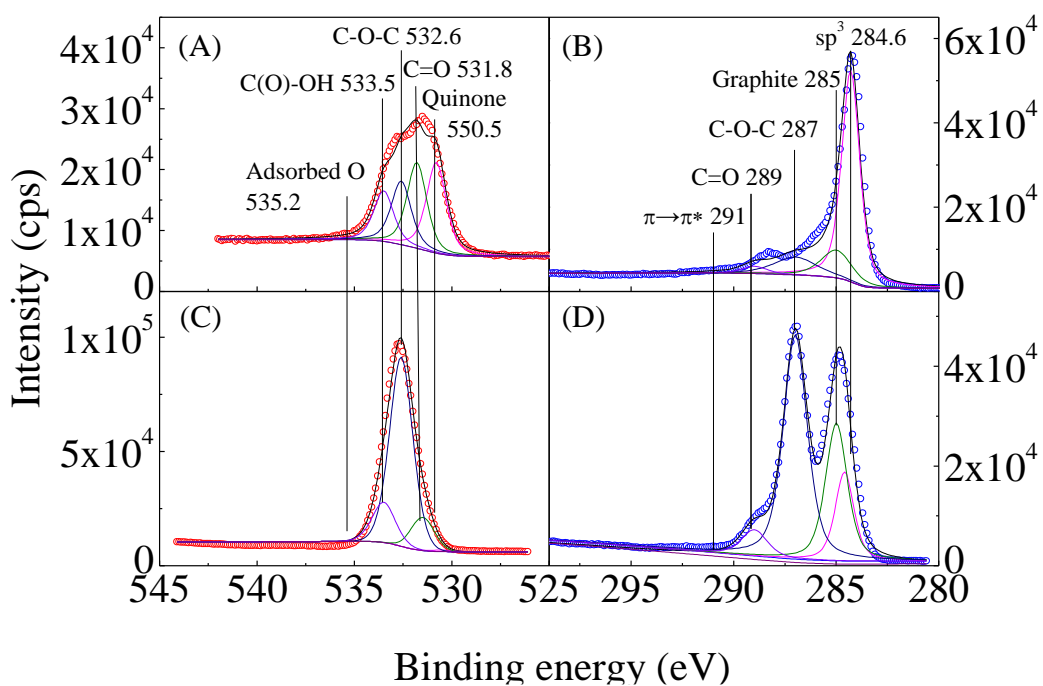

26

27 Figure S5. O1s and C1s XPS spectra of (A) and (B) for thermally treated graphene oxide in N<sub>2</sub>

28 flow at 200 °C; (C) and (D) for graphene oxide.

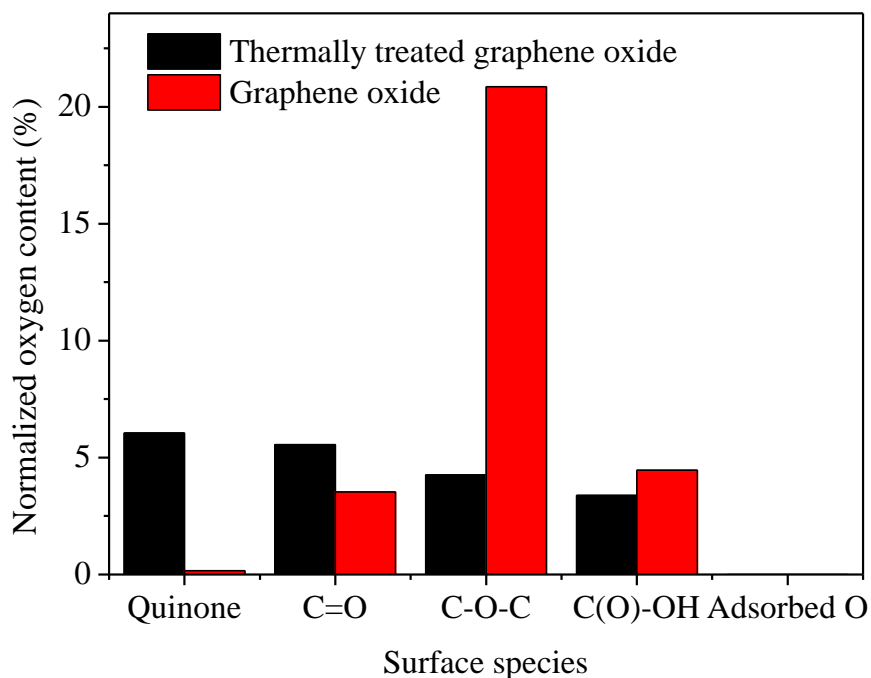

29

30 Figure S6. Species distribution of thermally treated graphene oxide in N<sub>2</sub> flow at 200 °C and

31 graphene oxide.
